# Supplementary material
Source: publisher figshare collection journal article supplement (https://acs.figshare.com/ndownloader/files/18509381)
Supplement: Supplementary file 1 [file 18509381]

Supporting information for:

# **A Toolkit for Rapid Modular Construction of Biological Circuits in Mammalian Cells**

João Pedro Fonseca<sup>1,7</sup>, Alain R. Bonny<sup>1,7</sup>, G. Renuka Kumar<sup>2</sup>, Andrew H. Ng<sup>3</sup>, Jason Town<sup>1</sup>, Qiu Chang Wu<sup>4</sup>, Elham Aslankoohi<sup>1</sup>, Susan Y. Chen<sup>1</sup>, Galen Dods<sup>1</sup>, Patrick Harrigan<sup>5</sup>, Lindsey C. Osimiri<sup>1,6</sup>, Amy L. Kistler<sup>2,\*</sup>, and Hana El-Samad<sup>1,2,\*</sup>

<sup>1</sup> Department of Biochemistry and Biophysics, California Institute for Quantitative Biosciences, University of California, San Francisco, San Francisco, CA 94158, USA

<sup>2</sup> Chan Zuckerberg Biohub, San Francisco, CA 94158, USA

<sup>3</sup> Cell Design Initiative, University of California, San Francisco

<sup>4</sup> Currently at Harvard Systems Biology Graduate Program, Cambridge, MA, USA

<sup>5</sup> Currently at Zymergen, Emeryville, CA, USA

<sup>6</sup> The UC Berkeley-UCSF Graduate Program in Bioengineering, University of California, San Francisco, San Francisco, CA 94132, USA

<sup>7</sup> Co-first author

\* To whom correspondence should be addressed: [amy.kistler@czbiohub.org](mailto:amy.kistler@czbiohub.org) and

[Hana.El-Samad@ucsf.edu](mailto:Hana.El-Samad@ucsf.edu)

# Supporting Information.

Supplementary Fig. 1. **Comparison of constitutive promoters across cell lines and delivery methods.**

Supplementary Fig. 2. **Comparison of impact of 3' UTRs across cell lines and delivery methods.**

Supplementary Fig. 3. **Generation of landing pads for human cell lines.**

Supplementary Fig. 4. **Building a linear classifier to distinguish target sgRNA knockdown populations.**

Supplementary Fig. 5. **Generation and quality control of multicistronic constructs for Zaire ebolavirus ribonucleoproteins.**

Supplementary Table 1. **Name and description of MTK library plasmids.**

Supplementary Table 2. **sgRNA sequences used in MTK library.**

Supplementary Table 3. **Primer sequences for part domestication.**

Supplementary Table 4. **Connector part overhang sequences.**

Figure S1

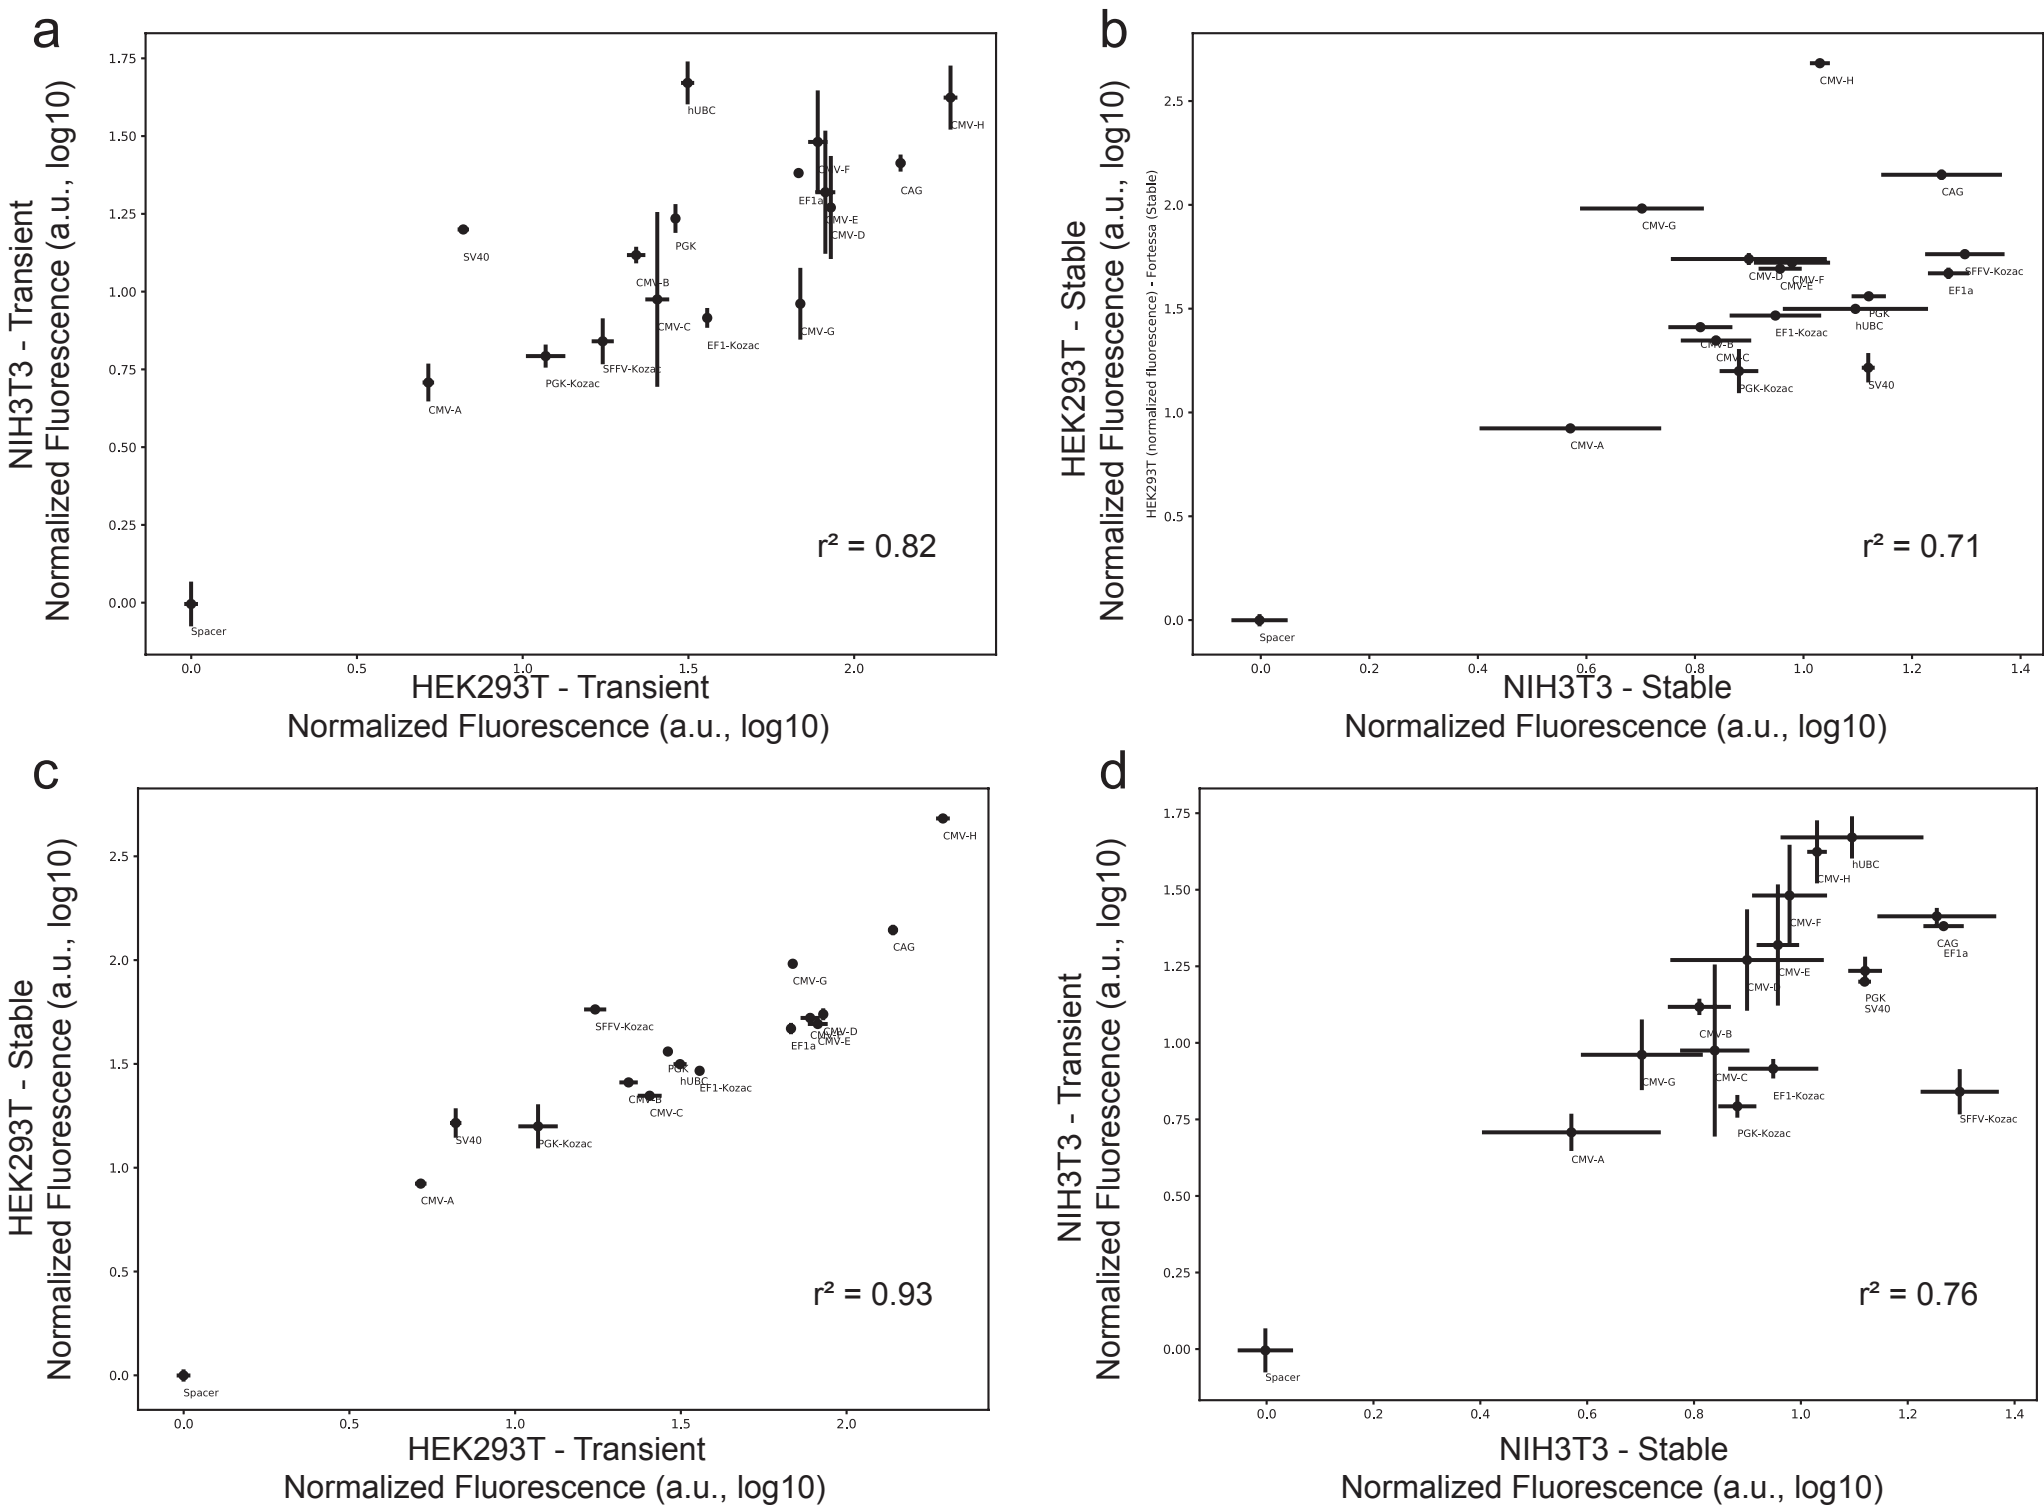

Figure S2

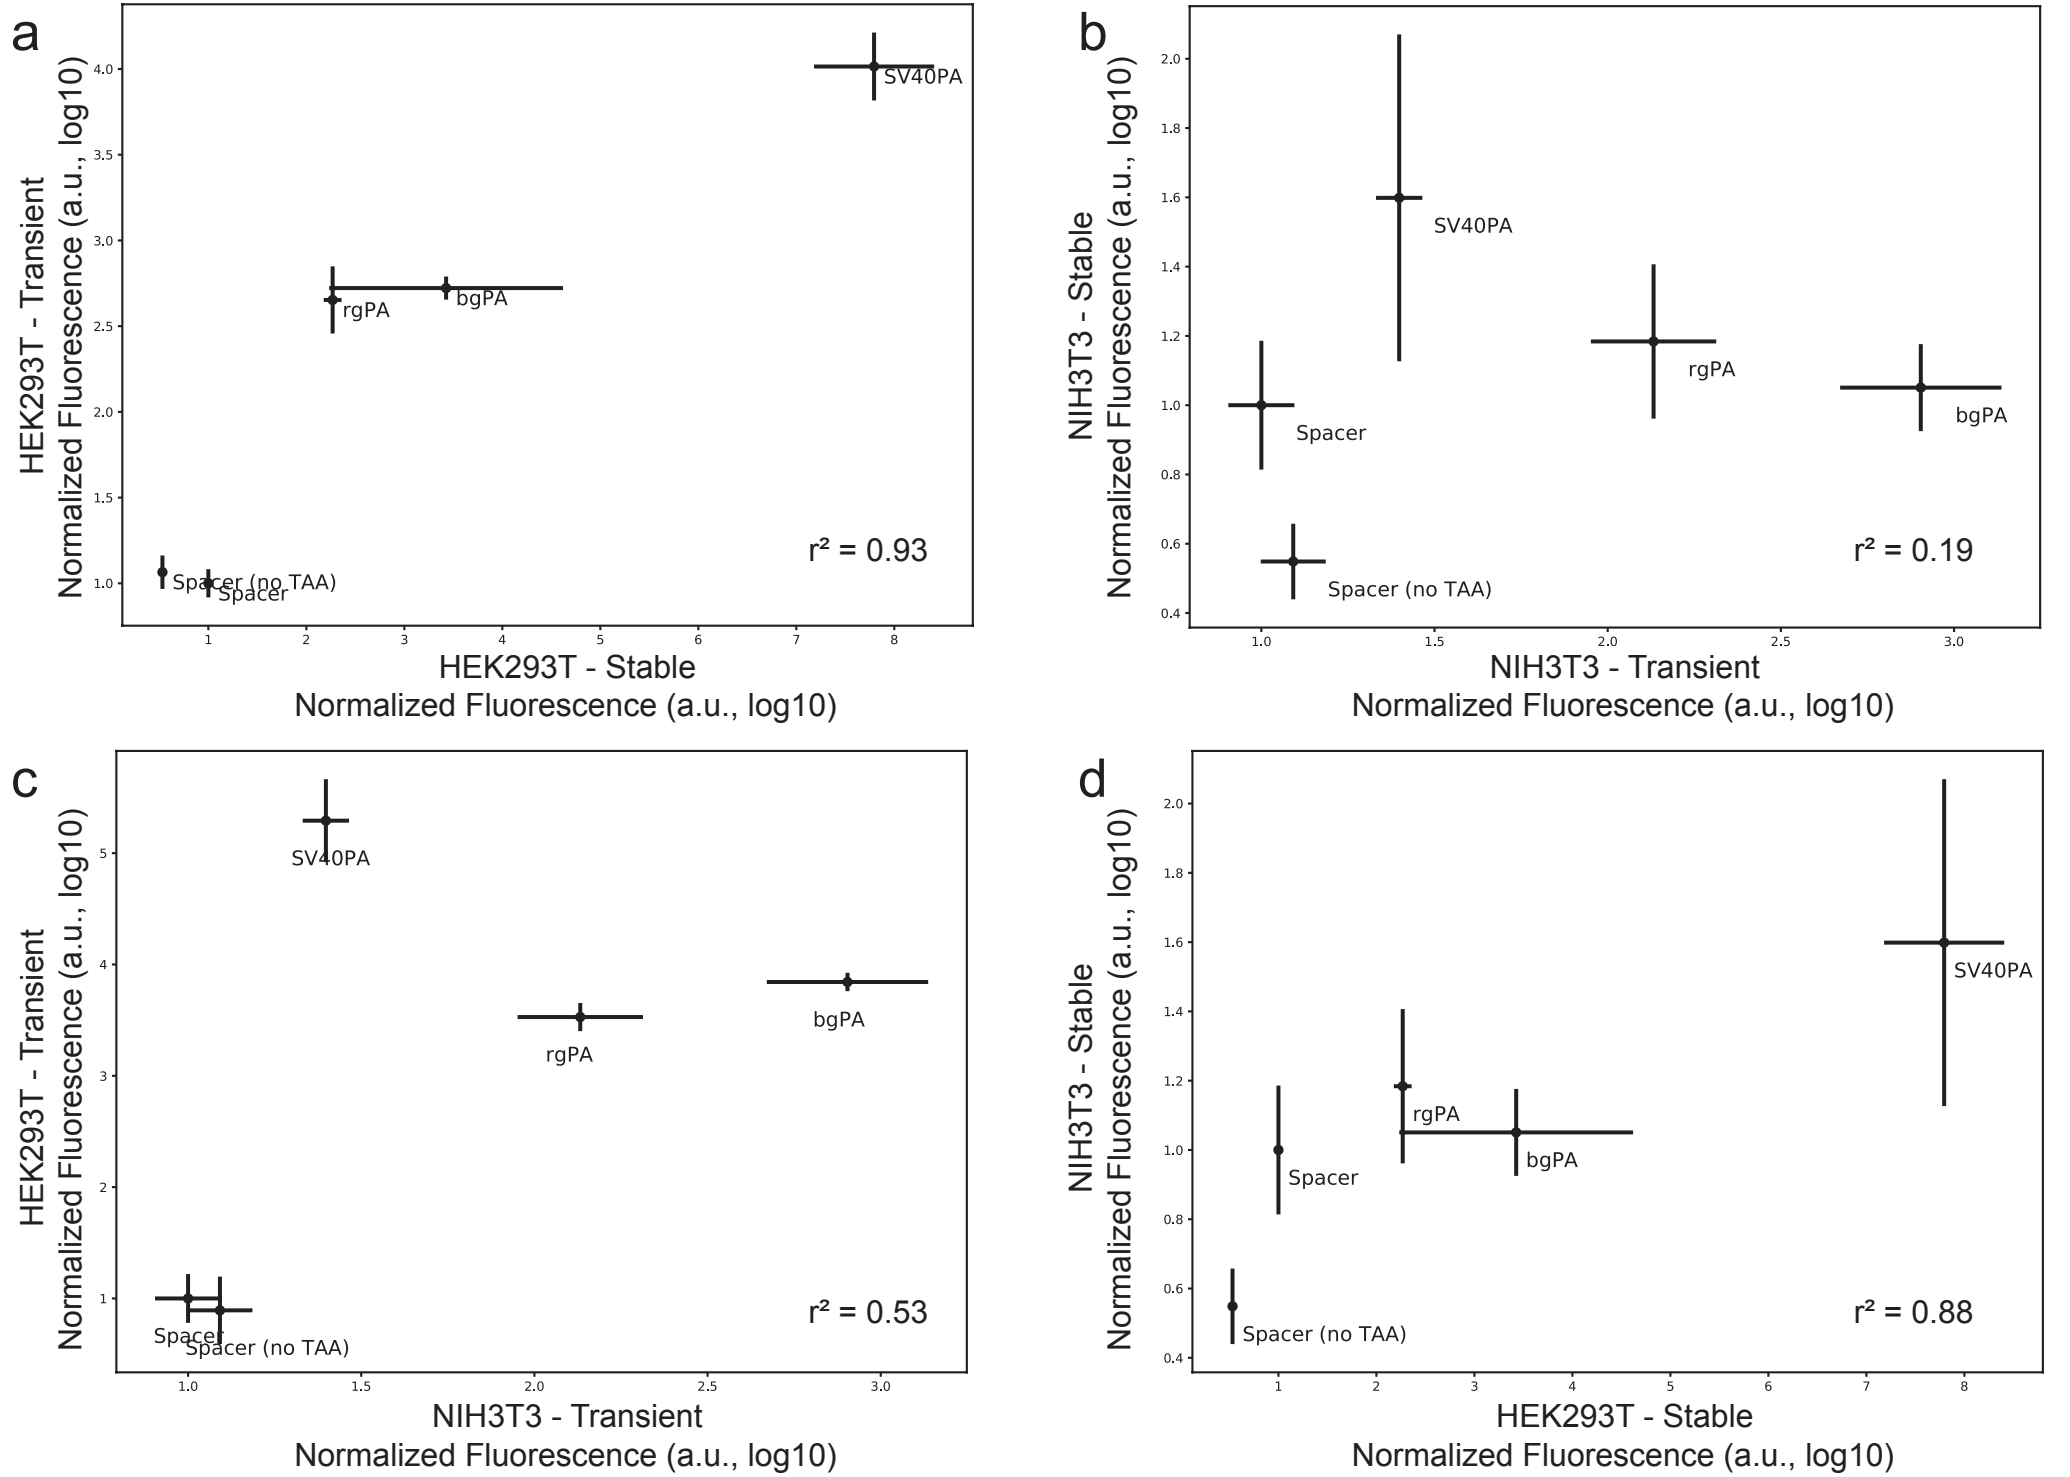

Figure S3

a

| Primer Name | Primer Sequence      |
|-------------|----------------------|
| P1          | CATCTCTCCTCCCTCACCCA |
| P2          | AGGGCTCCGTTAATGGTCAC |
| P3          | ATCCCTCCTCTCTGAACCCC |

b

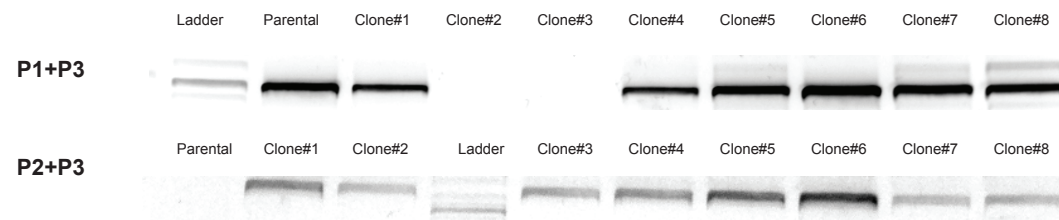

c

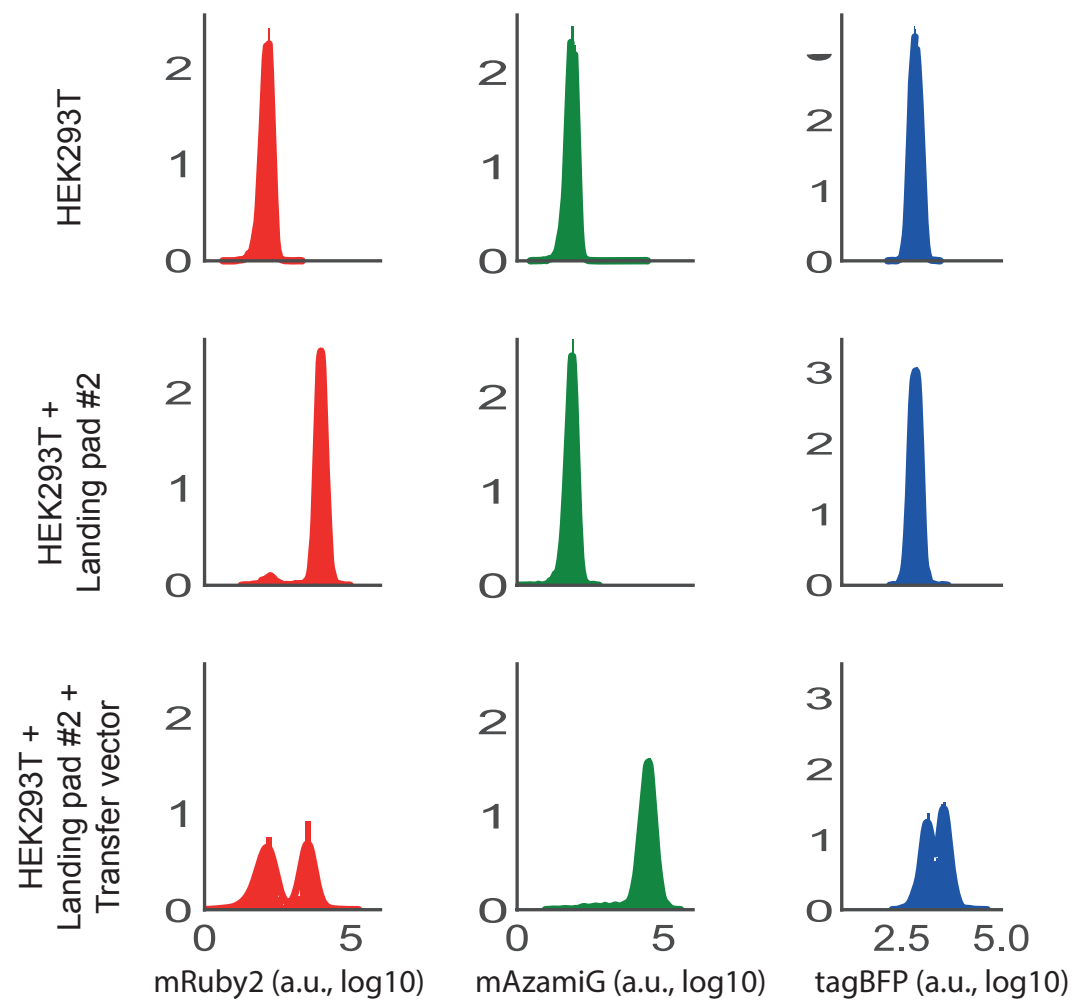

d

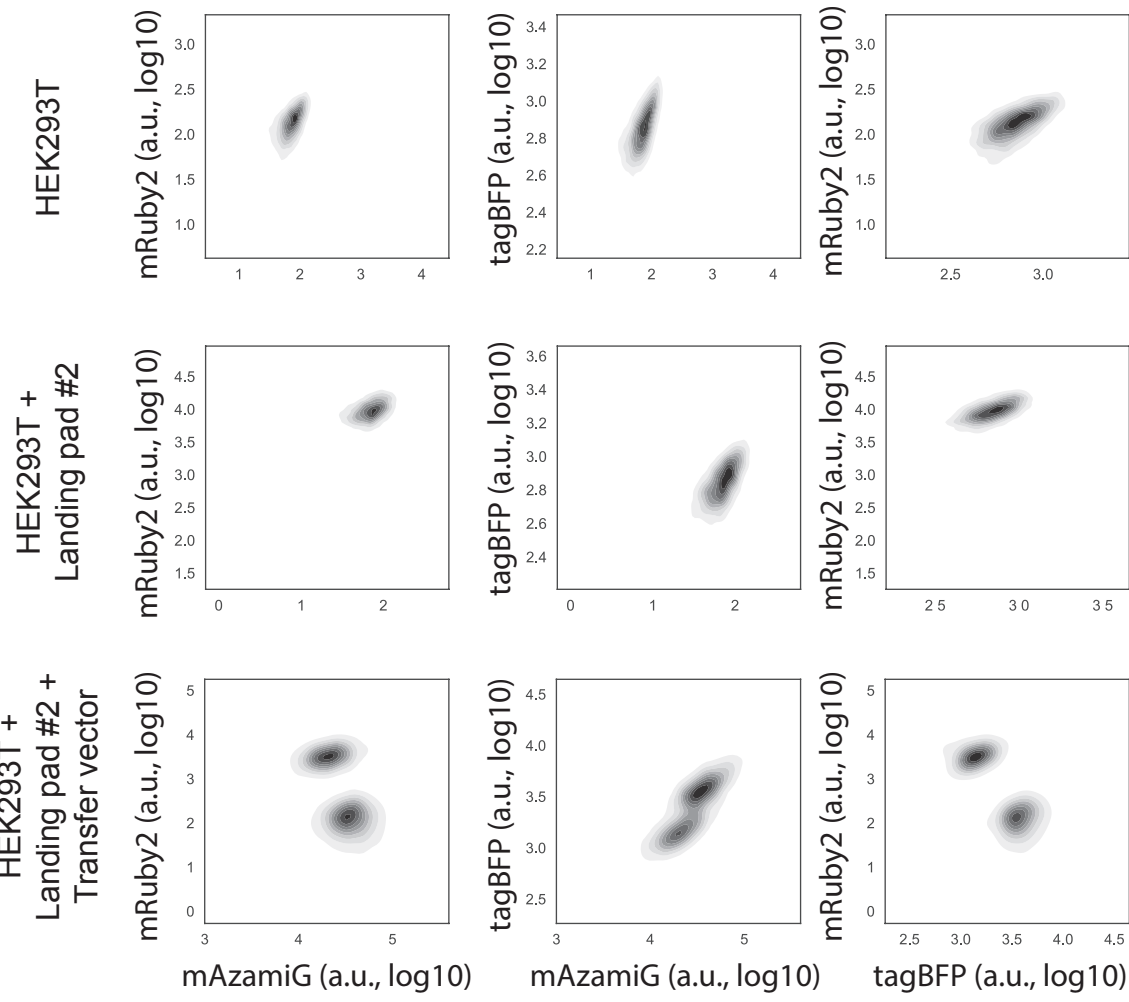

Figure S4.

**a**

Classification report

| Predicted label | tagBFP            | 218    | 2             | 12       | 127               |
|-----------------|-------------------|--------|---------------|----------|-------------------|
|                 | non targeting     | 23     | 193           | 164      | 47                |
|                 | mScarlet          | 2      | 19            | 71       | 5                 |
|                 | tagBFP + mScarlet | 10     | 8             | 18       | 81                |
|                 |                   | tagBFP | non targeting | mScarlet | tagBFP + mScarlet |
| True label      |                   |        |               |          |                   |

**b**

Confusion matrix

|                   |           |        |          |
|-------------------|-----------|--------|----------|
| non targeting     | 0.45      | 0.87   | 0.59     |
| mScarlet          | 0.73      | 0.27   | 0.39     |
| tagBFP            | 0.61      | 0.86   | 0.71     |
| tagBFP + mScarlet | 0.69      | 0.31   | 0.43     |
| Average           | 0.62      | 0.58   | 0.53     |
|                   | Precision | Recall | f1 score |

Figure S5.

a

| Donor Vector | Donor Name          | ZEBOV-4cis        |                  |
|--------------|---------------------|-------------------|------------------|
|              |                     | Colonies Screened | Colonies Correct |
| MTK0-43      | PiggyBac Transposon | 9                 | 9                |
| MTK0-13      | PhiC31 Integrase    | 4                 | 4                |
| MTK0-14      | BxB1 Integrase      | 4                 | 3                |
| MTK0-16      | PhiC31 tagBFP       | 4                 | 4                |
| MTK0-17      | BxB1 tagBFP         | 4                 | 4                |

b

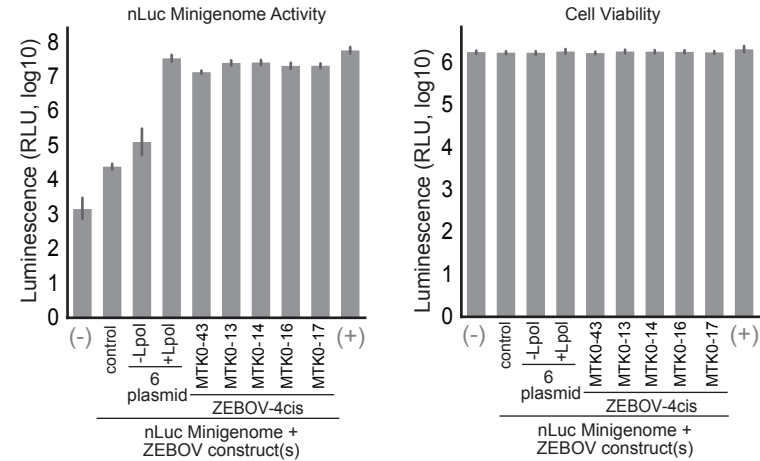

c

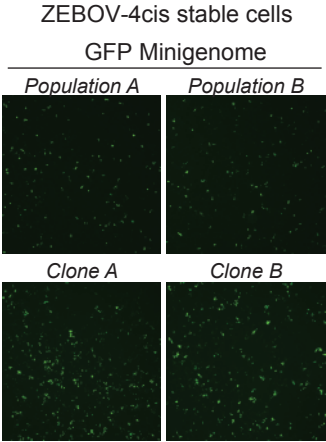

Supplementary Fig. 1. **Comparison of constitutive promoters across cell lines and delivery methods.** (a) The mAzamiGreen expression from transient transfection and PiggyBac integration of each promoter was assessed in HEK293T and (b) NIH3T3 cells. (c) mAzamiGreen expression of each promoter was compared between HEK293T and NIH3T3 in transient expression and (d) PiggyBac integration. Each point represents the mean of four biological replicates and error bars represent the standard deviation across replicates.

Supplementary Fig. 2. **Comparison of impact of 3' UTRs across cell lines and delivery methods.** (a) The mAzamiGreen expression from transient transfection and PiggyBac integration delivery of each 3' UTR was assessed in HEK293T and (b) NIH3T3 cells. (c) mAzamiGreen expression of each 3' UTR was compared between HEK293T and NIH3T3 in transient expression and (d) PiggyBac integration. Each point represents the mean of four biological replicates and error bars represent the standard deviation across replicates.

Supplementary Fig. 3. **Generation of landing pads for human cell lines.** (a) PCR products from landing pad genotyping. P1+P3 indicate presence of WT hAAVS1 locus and P2+P3 indicate presence of BxB1 landing pad in hAAVS1 locus. mRuby2, mAzamiGreen and tagBFP expression in populations of parental, Landing pad and Landing Pad with Transfer vector HEK293T cells. (b) mRuby2, mAzamiGreen and tagBFP expression in populations of parental, Landing pad #2 and Landing Pad #2 with Transfer vector HEK293T cells. In this clone, both wild type alleles of hAAVS1 locus were replaced by the landing pad construct, showing two populations as measured by fluorescence upon integration of the transfer vector and suggesting these two populations had one or two copies that integrated into the genome. mRuby2



expression indicates presence of hAAVS1 landing pad. mAzamiGreen and tagBFP expression indicates precise integration of transfer vector in hAAVS1 landing pad.

Supplementary Fig. 4. **Building a linear classifier to distinguish target sgRNA knockdown populations. (a)** Classification report of linear classifier. **(b)** Confusion matrix of linear classifier.

Supplementary Fig. 5. **Generation and quality control of multicistronic constructs for Zaire ebolavirus ribonucleoproteins. (a)** Multicistronic construct cloning efficiency. ZEBOV multicistronic construct containing 4 viral ORFs separated by P2A elements (ZEBOV-4cis) was BsmBI assembled directly into donor vectors for genome engineering. Specifically, ZEBOV-4cis was generated in donor vectors for PiggyBac transposon (MTK0-43), PhiC31 Integrase (MTK0-13, MTK0-16 tagBFP), and BxbI Integrase (MTK0-14, MTK0-17 tagBFP). The number of bacterial colonies screened and positive for correct construct by size (NotI digestions) is indicated. **(b)** Luminescence measurements of ZEBOV minigenome activity and cell viability. HEK293T cells were transfected with ZEBOV nLuc minigenome in combination with pCAGGs empty control plasmid (control), the ZEBOV 6 plasmids (with or without Lpol: +Lpol, -Lpol), or with ZEBOV-4cis in various part 0 donor vectors. Positive (+) and negative (-) controls include transfection of only pCAGGS-nLuc plasmid or pCAGGs empty plasmid, respectively. Nano luciferase activity was measured two days post transfection. Bar plots represent the mean of biological replicates (n=2). **(c)** GFP analysis of minigenome activity in stable cells. ZEBOV-4cis stable populations and clones were transfected with a T7-driven ZEBOV minigenome construct encoding the eGFP reporter along with T7 polymerase. After 2 days cells were imaged for GFP detection (Leica, 4X).

### Supplementary Table 1

[illegible]

[illegible]



Supplementary Table 2

| Figure | Target Locus        | Protospacer Sequence | Cas9 Species (Part Plasmid) | PAM Sequence | Forward Oligo                  | Reverse Oligo                  | Backbone Vector | Source                             |
|--------|---------------------|----------------------|-----------------------------|--------------|--------------------------------|--------------------------------|-----------------|------------------------------------|
| 3      | hAAVS1 (site 1)     | GAGCCACATTAACCGGCCCT | S. pyogenes (MTK3_025)      | GGG          | 5' TGTTTGGAGCCACATTAACCGGCCCTG | 5' TAAACAGGGCCGGTTAATGTGGCTCCA | MTK234_002      | This study                         |
| 3      | hAAVS1 (site 2)     | GAGCCACATTAACCGGCCCT | S. pyogenes (MTK3_025)      | TGG          | 5' TGTTTGATTCCCAGGGCCGGTTAATGG | 5' TAAACCATTAACCGGCCCTGGGAATCA | MTK234_002      | This study                         |
| 3      | hAAVS1 (site 3)     | GGGGCCACTAGGGACAGGAT | S. pyogenes (MTK3_025)      | TGG          | 5' TGTTTGGGGGCCACTAGGGACAGGATG | 5' TAAACATCCTGTCCCTAGTGGCCCCCA | MTK234_002      | This study                         |
| 4      | tagBFP              | CTACAACGTCAAGATCAGAG | S. pyogenes (MTK3_025)      | GGG          | 5' TGTTTGCTACAACGTCAAGATCAGAGG | 5' TAAACCTCTGATCTTGACGTTGTAGCA | MTK234_002      | This study                         |
| 4      | mScarlet            | CCACAACGAAGATTATACCG | S. pyogenes (MTK3_025)      | TGG          | 5' TGTTTGCCACAACGAAGATTATACCGG | 5' TAAACCGGTATAATCTTCGTTGTGGCA | MTK234_002      | This study                         |
| 4      | human non-targeting | ACGGAGGCTAAGCGTCGCAA | S. pyogenes (MTK3_025)      |              | 5' TGTTTGACGGAGGCTAAGCGTCGCAAG | 5' TAAACTTGCGACGCTTAGCCTCCGTCA | MTK234_002      | Doench, J. G. <i>et al.</i> (2016) |
| 5      | TRE                 | TACGTTCTCTACTGATA    | S. pyogenes (MTK3_025)      | GGG          | 5' TGTTTGACGTTCTCTATCACTGATAG  | 5' TAAACTATCAGTGATAGAGAACGTACA | MTK234_002      | Gao, Y. <i>et al.</i> (2016)       |
| 5      | TRE                 | GTTACTCCCTATCAGTGATA | S. aureus (MTK3b_019)       | AGGAGT       | 5' TGTTTGGTTACTCCCTATCAGTGATAG | 5' ATAACTATCACTGATAGGGAGTAACCA | MTK234_050      | Gao, Y. <i>et al.</i> (2016)       |
| 5      | UAS                 | GAGCACTGTCTCCGAACGT  | S. pyogenes (MTK3_025)      | CGG          | 5' TGTTTGGAGCACTGTCTCCGAACGTG  | 5' TAAACACGTTCGGAGGACAGTGCTCCA | MTK234_002      | This study                         |
| 5      | UAS                 | GAACGTCGGAGCACTGTCCT | S. aureus (MTK3b_019)       | CCGAAC       | 5' TGTTTGAACGTCGGAGCACTGTCCTG  | 5' ATAACAGGACAGTGCTCCGACGTTCCA | MTK234_050      | This study                         |

Supplementary Table 3

| Part                   | Forward Primer                            | Reverse Primer                                 | Destination Vector | Notes                                                       |
|------------------------|-------------------------------------------|------------------------------------------------|--------------------|-------------------------------------------------------------|
|                        | 1 5' gcatCGTCTCcatcGGTCTCaCCCTCGTCTCaNNNN | 5' gcatCGTCTCaGGTCTCaCGTT                      | MTK0_027           | NNNN is barcode for connector, see supplemental table 4     |
| 1 (reverse connectors) | 5' gcatCGTCTCcatcGGTCTCaCCCT              | 5' gcatCGTCTCaGGTCTCaCGTTCGTCTCINNNN           | MTK0_027           | NNNN is barcode for connector, see supplemental table 4     |
|                        | 2 5' gcatCGTCTCcatcGGTCTCaAACG            | 5' gcatCGTCTCaGGTCTCaCATA                      | MTK0_027           |                                                             |
|                        | 3 5' gcatCGTCTCcatcGGTCTCaTATG            | 5' gcatCGTCTCaGGTCTCaGGAT                      | MTK0_027           |                                                             |
| 3a                     | 5' gcatCGTCTCcatcGGTCTCaTATG              | 5' gcatCGTCTCaGGTCTCaAGAA                      | MTK0_027           |                                                             |
| 3b                     | 5' gcatCGTCTCcatcGGTCTCaTTCT              | 5' gcatCGTCTCaGGTCTCaGGAT                      | MTK0_027           |                                                             |
|                        | 4 5' gcatCGTCTCcatcGGTCTCaATCCTaa         | 5' gcatCGTCTCaGGTCTCaCAGC                      | MTK0_027           |                                                             |
| 4a                     | 5' gcatCGTCTCcatcGGTCTCaATCC              | 5' gcatCGTCTCaGGTCTCaGCCA                      | MTK0_027           | remove first 3 bases (taa) for multicistronic use           |
| 4b                     | 5' gcatCGTCTCcatcGGTCTCaTCGG              | 5' gcatCGTCTCaGGTCTCaCAGC                      | MTK0_027           |                                                             |
|                        | 5 5' gcatCGTCTCcatcGGTCTCaGCTG            | 5' gcatCGTCTCaGGTCTCaTGACGTCTCINNNN            | MTK0_027           | NNNN is barcode for connector, see supplemental table 4     |
| 5 (reverse connectors) | 5' gcatCGTCTCcatcGGTCTCaGCTGCGTCTCaNNNN   | 5' gcatCGTCTCaGGTCTCaTGTA                      | MTK0_027           | NNNN is barcode for connector, see supplemental table 4     |
|                        | 6 5' gcatCGTCTCcatcGGTCTCaTACA            | 5' gcatCGTCTCaGGTCTCaACTC                      | MTK0_027           |                                                             |
|                        | 7 5' gcatCGTCTCcatcGGTCTCaGAGT            | 5' gcatCGTCTCaGGTCTCaTCGG                      | MTK0_027           |                                                             |
|                        | 8 5' gcatCGTCTCcatcGGTCTCaCCGA            | 5' gcatCGTCTCaGGTCTCaAGGG                      | MTK0_027           |                                                             |
| 8a                     | 5' gcatCGTCTCcatcGGTCTCaCCGA              | 5' gcatCGTCTCaGGTCTCaATTG                      | MTK0_027           |                                                             |
| 8b                     | 5' gcatCGTCTCcatcGGTCTCaCAAT              | 5' gcatCGTCTCaGGTCTCaAGGG                      | MTK0_027           |                                                             |
| 234                    | 5' gcatCGTCTCcatcGGTCTCaAACG              | 5' gcatCGTCTCaGGTCTCaCAGC                      | MTK0_027           |                                                             |
| 234 (SpCas9 sgRNA)     | 5' TGTTTGNNNNNNNNNNNNNNNNNNNG             | 5' TAAACN'N'N'N'N'N'N'N'N'N'N'N'N'N'N'N'N'N'CA | MTK234_002         | N(20) are guide specific sequence, N' is reverse complement |
| 234 (SaCas9 sgRNA)     | 5 TGTTTGNNNNNNNNNNNNNNNNNNNG              | 5' ATAACN'N'N'N'N'N'N'N'N'N'N'N'N'N'N'N'N'CA   | MTK234_050         | N(20) are guide specific sequence, N' is reverse complement |

Supplementary Table 4

| Connector | Overhang |
|-----------|----------|
| LS, LS'   | 5' CTGA  |
| L1, R1    | 5' CCAA  |
| L2, R2    | 5' GATG  |
| L3, R3    | 5' GTTC  |
| L4, R4    | 5' GGTA  |
| L5, R5    | 5' AAGT  |
| L6, R6    | 5' CCCT  |
| L7, R7    | 5' GCGG  |
| L8, R8    | 5' TTTA  |
| RE, RE'   | 5' AGCA  |
